# Supplementary material for: Artificial intelligence in colposcopic examination: A promising tool to assist junior colposcopists
Source: PubMed Central journal article supplement (PMC10088560; doi:10.3389/fmed.2023.1060451), 2023-03-15
Supplement: Data_Sheet_1.pdf [file Data_Sheet_1.pdf]

## Supplementary Material

### 1 Supplementary Figures

#### 1.1 Supplementary Figure 1

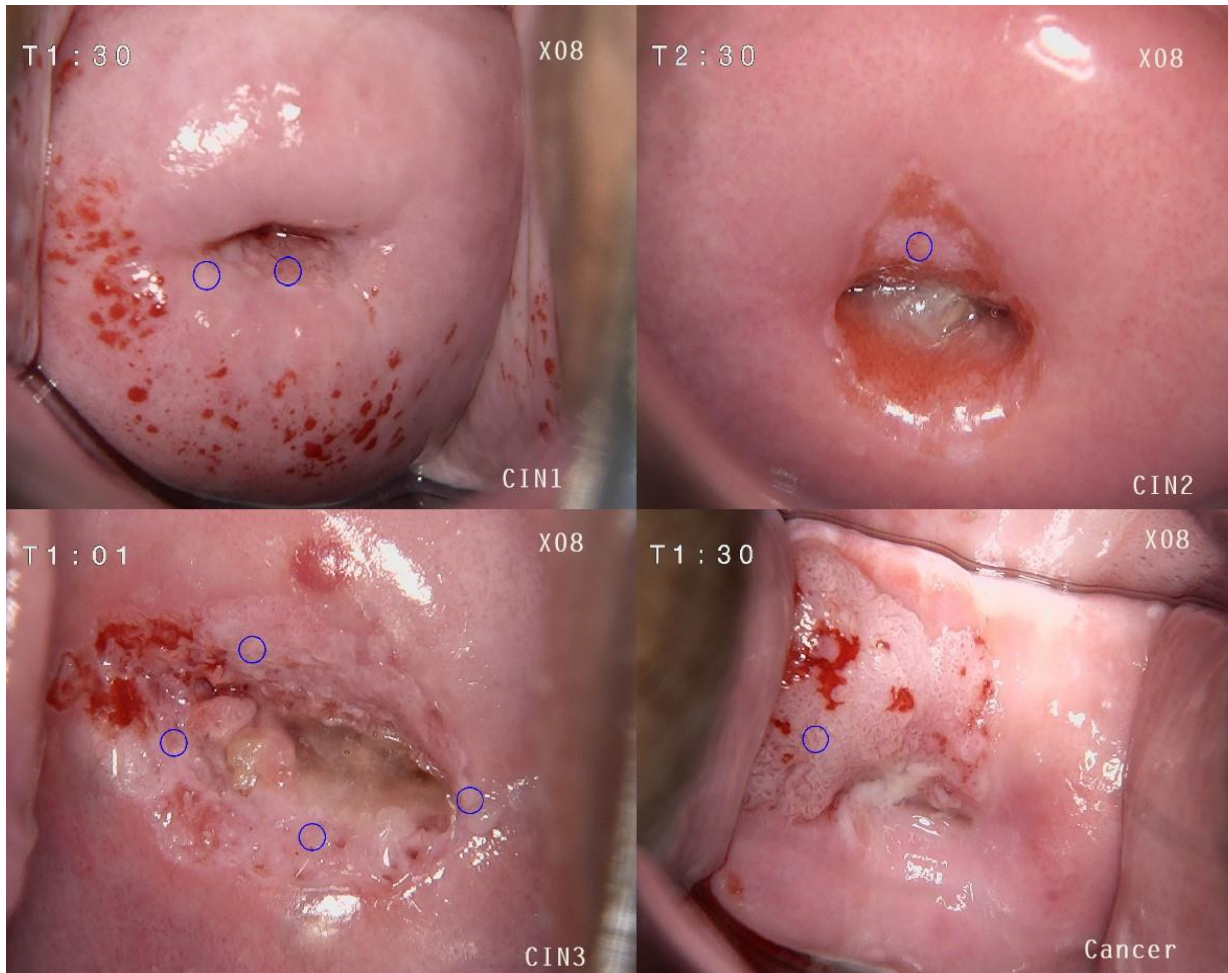

**SupFig 1.** Photos showing the biopsy sites indicated by CAIADS. The blue circles represent the indicated biopsy sites by CAIADS. Abbreviations: CAIADS, Colposcopic Artificial Intelligence Auxiliary Diagnostic System; CIN, cervical intraepithelial neoplasia; CIN1, CIN grade 1; CIN2, CIN grade 2; CIN3, CIN grade 3.

## 1.2 Supplementary Figure 2

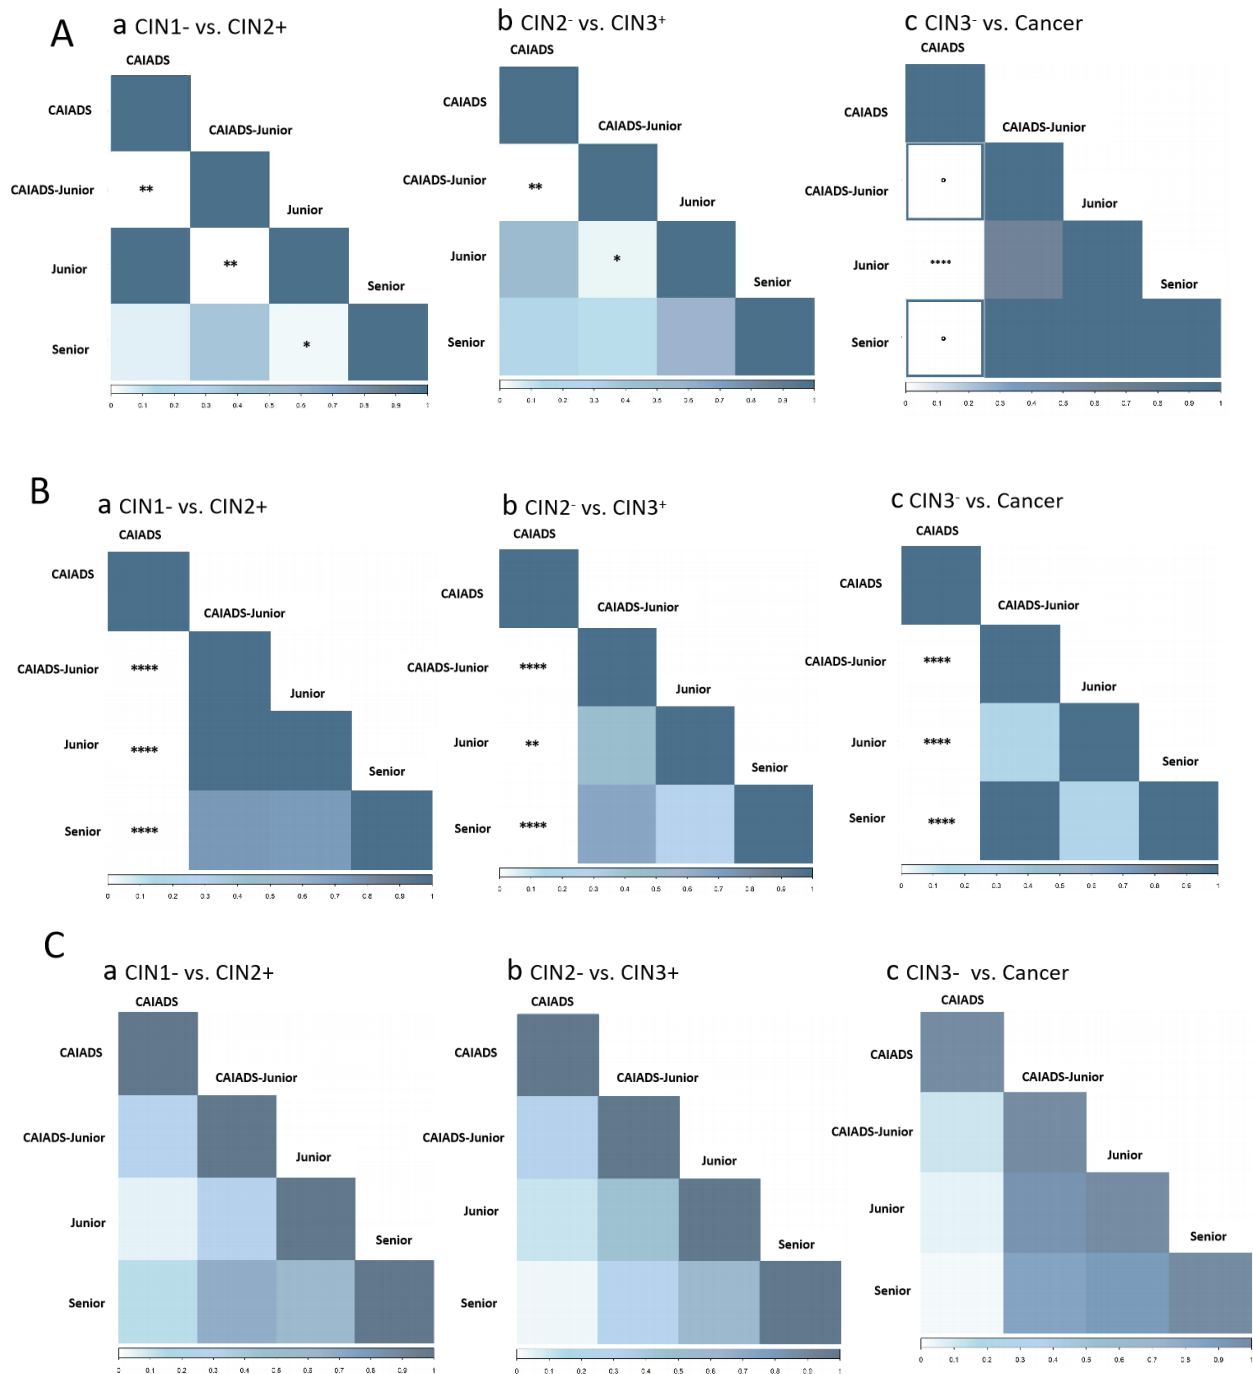

**D**
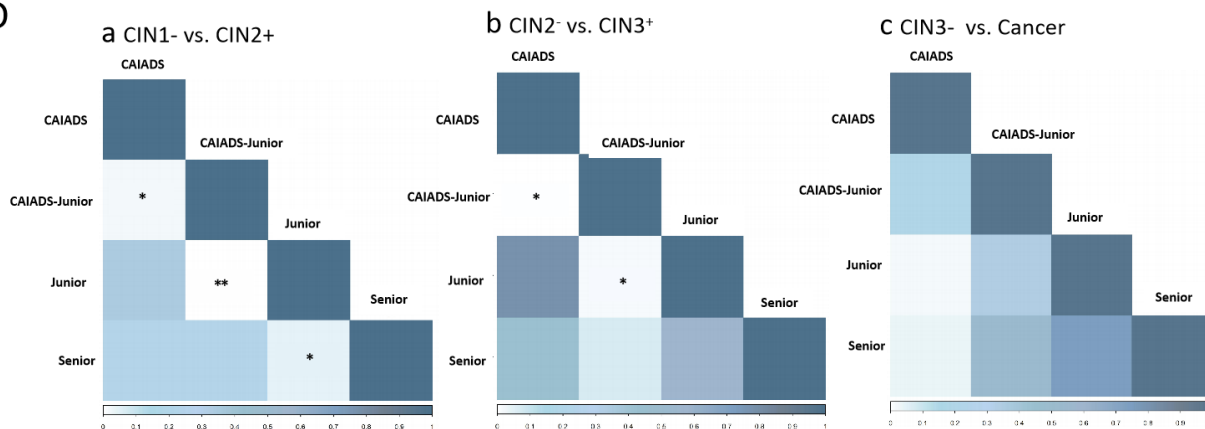
**E**
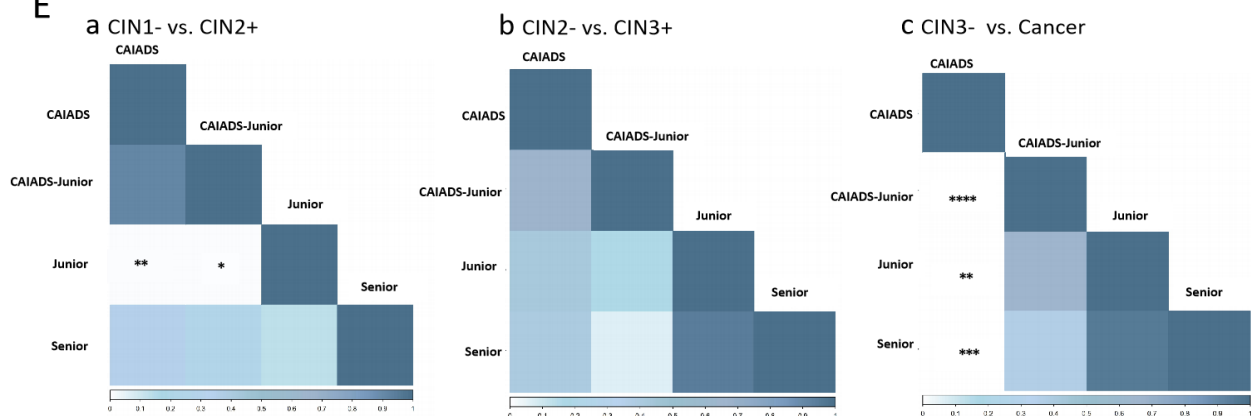

**SupFig 2.** The statistical differences of diagnostic performance between the subspecialists for detecting different histology results in the sensitivity (A), the specificity (B), the positive predictive value (C), the negative predictive value (D), and AUC (E). \*  $p < 0.05$ , \*\*  $p < 0.01$ , \*\*\*  $p < 0.001$ , \*\*\*\*  $p < 0.0001$ . Abbreviations: CAIADS, Colposcopic Artificial Intelligence Auxiliary Diagnostic System; CAIADS-Junior, CAIADS-assisted junior colposcopist; CIN, cervical intraepithelial neoplasia; CIN1-, CIN grade 1 or less; CIN2-, CIN grade 2 or less; CIN3-, CIN grade 3 or less; CIN2+, CIN grade 2 or worse; CIN3+, CIN grade 3 or worse.

## 2 Supplementary Table 1

**Supplement Table 1. Factors influencing the accuracy of CAIADS judgement**

| Characteristic                    | n(%)      | Univariate Analysis |              | Multivariable Analysis |          |
|-----------------------------------|-----------|---------------------|--------------|------------------------|----------|
|                                   |           | OR (95% CI)         | <i>p</i>     | OR (95% CI)            | <i>p</i> |
| <b>Age</b>                        |           |                     | <b>0.050</b> |                        | 0.135    |
| [20-49]                           | 200(54.6) | 1                   | -            | 1                      | -        |
| ≥50                               | 166(45.4) | 0.50 (0.25-1.00)    | -            | 0.50(0.20-1.24)        | -        |
| <b>Ethnicity</b>                  |           |                     | 0.911        |                        | 0.333    |
| Han                               | 215(58.7) | 1                   | -            | 1                      | -        |
| Others <sup>a</sup>               | 151(41.3) | 0.96 (0.49-1.90)    | -            | 0.66(0.29-1.52)        | -        |
| <b>BMI</b>                        |           |                     | 0.169        |                        | 0.227    |
| [18.5-23.9]                       | 193(52.7) | 1                   | -            | 1                      | -        |
| <18.5 or >23.9                    | 173(47.3) | 0.62 (0.31-1.22)    | -            | 0.65(0.32-1.31)        | -        |
| <b>Education</b>                  |           |                     | 0.327        |                        | 0.429    |
| Blew middle school                | 137(37.4) | 1                   | -            | 1                      | -        |
| High school or above              | 229(62.6) | 1.40 (0.71-2.76)    | -            | 1.36(0.64-2.87)        | -        |
| <b>Number of parities</b>         |           |                     | 0.416        |                        | 0.109    |
| ≤1                                | 189(51.6) | 1                   | -            | 1                      | -        |
| >1                                | 177(48.4) | 1.33 (0.67-2.62)    | -            | 2.02(0.86-4.75)        | -        |
| <b>Stages of menopause</b>        |           |                     | 0.117        |                        | 0.727    |
| Postmenopausal                    | 113(30.9) | 1                   | -            | 1                      | -        |
| Pre-menopausal                    | 253(69.1) | 1.73 (0.87-3.44)    | -            | 1.17(0.48-2.87)        | -        |
| <b>Cytology</b>                   |           |                     | 0.746        |                        | 0.746    |
| NILM                              | 221(60.4) | 1                   | -            | 1                      | -        |
| ASC-US and LSIL                   | 99(27.0)  | 0.84 (0.39-1.82)    | 0.658        | 0.82(0.37-1.83)        | 0.626    |
| ASC-H, HSIL, and AGC              | 46(12.6)  | 0.70 (0.27-1.84)    | 0.471        | 0.70(0.26-1.90)        | 0.487    |
| <b>HPV test</b>                   |           |                     | 0.773        |                        | 0.529    |
| Negative                          | 58(15.8)  | 1                   | -            | 1                      | -        |
| HPV 16/18 positive                | 164(44.8) | 0.72 (0.26-2.03)    | 0.533        | 0.65(0.22-1.89)        | 0.430    |
| Other high-risk subtypes positive | 144(39.3) | 0.88 (0.30-2.55)    | 0.808        | 0.97(0.32-2.94)        | 0.958    |
| <b>Biopsy types</b>               |           |                     | 0.237        |                        | 0.266    |
| Targeted biopsy                   | 248(67.8) | 1                   | -            | 1                      | -        |
| Random biopsy                     | 118(32.2) | 1.60 (0.73-3.51)    | -            | 1.58(0.71-3.54)        | -        |

<sup>a</sup>, Uighur, Kazak, Mongolian, Hui, Kirgiz;  $p < 0.05$ ; significant  $p$  values are bolded. Abbreviations: OR, odds ratio; CI, confidence interval; BMI, body mass index,  $\text{kg}/\text{m}^2$ ; NILM, negative for intraepithelial lesion or malignancy; ASC-US, atypical squamous cells of undetermined significance; LSIL, low-grade squamous intraepithelial lesions; HSIL, high-grade squamous intraepithelial lesions; ASC-H, atypical squamous cells of undetermined significance cannot exclude HSIL; AGC, atypical glandular cells; HPV, human papillomavirus.
